# Supplementary material for: Experiences and beliefs related to exclusive breastfeeding (EBF) and early supplementation in urban slums of Karachi, Pakistan-A qualitative study
Source: Research Square preprint supplement (doi:10.21203/rs.3.rs-6663743/v1), 2025-06-13
Supplement: Supplementary file 1 [file 0c982aacfe329a0b062bbce4.docx]

TABLE 1. Caregiver participant demographics

| Caregiver | Number (Percent) |
| --- | --- |
| Mothers |  |
| Age (years) |  |
| 16-20 | 16 (23.5%) |
| 21-25 | 22 (32.3%) |
| 26-30 | 20 (29.4%) |
| 31-35 | 9 (13.2%) |
| 35-40 | 1 (1.47%) |
| Education |  |
| No schooling | 38 (55.8%) |
| 1-4 | 16 (23.5%) |
| 5-9 years | 1(1.47%) |
| 10+ years | 13(19.1%) |
| Occupation |  |
| Housewife | 68 (100%) |
| Marital Status |  |
| Married | 68 (100%) |
| Fathers |  |
| Age (years) |  |
| 20-25 | 7 (87.55) |
| 26-30 | 0 |
| 31-35 | 1 (12.5%) |
| Education |  |
| No schooling | 5 (62.5%) |
| 1-4 years | 0 |
| 10+ years | 3 (37.5 %) |
| Occupation |  |
| Fisherman | 5 (62.5%) |
| Labor | 1(12.5%) |
| Teacher | 1(12.5%) |
| Private job | 1(12.5%) |
| Mothers-in-law (paternal grandmothers) |  |
| Age (years) |  |
| 40-45 | 2 (25 %) |
| 46-50 | 4 (50%) |
| 51-55 | 2(25 %) |
| Education |  |
| Primary | 0 |
| Secondary | 0 |
| Matric | 0 |
| Intermediate | 0 |
| Graduate | 0 |
| Illiterate | 8 (100%) |
| Occupation |  |
| Housewife | 8(100%) |
